# Supplementary material for: Genetic diversity analysis and molecular characteristics of wild centipedegrass using sequence-related amplified polymorphism (SRAP) markers
Source: PeerJ. 2023 Aug 24;11:e15900. doi: 10.7717/peerj.15900 (PMC10460567; doi:10.7717/peerj.15900)
Supplement: Supplemental Information 6 — Raw data for figure 2 [file peerj-11-15900-s006.xlsx]

## Sheet: Sheet1
	BIO1	BIO2	BIO3	BIO4	BIO5	BIO6	BIO7	BIO8	BIO9	BIO10	BIO11	BIO12	BIO13	BIO14	BIO15	BIO16	BIO17	BIO18	BIO19
Er01	18.53	6.75	23.85	763.46	33.6	5.3	28.3	25.45	8.88	27.85	8.88	1093	177	18	63.98	476	62	447	62
Er02	18.27	6.78	24.05	762.86	33.3	5.1	28.2	25.23	8.62	27.57	8.62	1099	177	18	63.58	480	63	449	63
Er03	14.6	7.42	26.21	758.92	29.2	0.9	28.3	21.7	4.88	23.68	4.88	1356	192	24	60.13	573	79	543	79
Er04	16.74	8.34	27.53	813.84	32.3	2	30.3	24.42	6.3	26.48	6.3	1268	190	28	57.18	541	90	500	90
Er05	15.34	7.78	26.9	774.09	30.2	1.3	28.9	22.63	5.43	24.62	5.43	1399	204	25	60.23	601	84	568	84
Er06	15.23	8.16	27.29	803.64	30.5	0.6	29.9	22.83	4.93	24.85	4.93	1327	200	30	56.75	559	96	520	96
Er07	18.61	9.28	33.15	673.16	32.3	4.3	28	22.1	11.38	26.37	9.8	1704	295	42	61.83	798	153	561	208
Er08	16.71	7.96	24.64	889.02	33.1	0.8	32.3	24.8	12.78	27.43	5.58	1350	201	45	46.13	503	158	485	195
Er09	20.58	8.51	34.59	593	31.7	7.1	24.6	23.7	14.45	27.07	12.73	2051	386	33	71.43	987	126	841	179
Er10	17.13	6.53	20.87	903.69	32.6	1.3	31.3	21.57	5.6	28.02	5.6	1303	208	42	50.2	563	160	431	160
Er11	24.39	7.83	43.72	365.37	32.5	14.6	17.9	26.48	19.35	28.2	19.35	1858	345	32	67.94	880	118	674	118
Er12	22.75	7.12	34.05	518.1	31.9	11	20.9	28.38	17.55	28.38	15.88	2065	356	29	78.58	1051	96	1051	108
Er13	17.09	8.39	26.81	854.57	32.5	1.2	31.3	27.33	6.12	27.33	6.17	1143	211	22	65.25	535	78	535	78
Er14	16.98	7.37	27.49	713.5	30.3	3.5	26.8	24.68	7.65	25.4	7.65	1447	364	14	101.33	896	51	857	51
Er15	7.88	8.61	32.73	627.75	20.2	-6.1	26.3	15.28	-0.32	15.28	-0.32	1065	195	8	83.36	557	31	557	31
Er16	17.54	7.23	27.68	687.75	30.6	4.5	26.1	24.93	8.52	25.63	8.52	1366	320	15	94.12	795	55	790	55
Er17	17.88	6.68	25.03	721.57	31.7	5	26.7	26.48	8.53	26.48	8.53	1073	205	18	77.29	552	59	552	59
COMMON	17.05	6.99	26.69	704.65	30.1	3.9	26.2	24.63	7.83	25.37	7.83	1303	316	12	99.64	790	48	775	48
Er19	17.35	7.53	28.72	679.98	30.4	4.2	26.2	24.77	8.45	25.33	8.45	1647	409	16	100.42	1006	61	975	61
Er20	18.32	6.91	26.37	699.63	31.8	5.6	26.2	26.63	9.25	26.63	9.25	1157	237	18	79.59	616	64	616	64
Er21	14.95	8.08	29.15	713.86	28.2	0.5	27.7	22.63	5.62	23.35	5.62	984	233	6	98.96	597	25	570	25
Er22	12.05	8.96	32.22	679.46	25.3	-2.5	27.8	19.5	3.22	20.1	3.22	977	213	7	91.15	553	26	535	26
Er23	26.15	15	50.82	550.47	40.4	10.9	29.5	31.63	20.42	31.63	18.68	8	6	0	266.29	8	0	8	0
