# Supplementary material for: Genetic diversity analysis and molecular characteristics of wild centipedegrass using sequence-related amplified polymorphism (SRAP) markers
Source: PeerJ. 2023 Aug 24;11:e15900. doi: 10.7717/peerj.15900 (PMC10460567; doi:10.7717/peerj.15900)
Supplement: Supplemental Information 8 — Statistical results for Figure 2. Note: **: Very significant difference (p < 0.01), *: Significant difference (p < 0.05). [file peerj-11-15900-s008.xlsx]

## Sheet: Correlation data
	SC		CQ		OT		Total
	r	p	r	p	r	p	r	p
BIO1	0.2298	0.0771	0.2677	0.1833	-0.3235	0.0881	0.1267	0.1627
BIO2	0.0845	0.3201	0.3895	0.0028	0.1303	0.2637	0.1831	0.1127
BIO3	-0.0092	0.4095	0.4859	0.0361	0.0098	0.453	0.1511	0.1299
BIO4	0.5064	0.0037	0.1354	0.2361	0.0544	0.4017	0.159	0.106
BIO5	0.1685	0.2298	0.2096	0.1889	0.1261	0.2403	0.1007	0.2285
BIO6	0.2652	0.042	0.1225	0.3069	-0.1665	0.2333	0.1206	0.1628
BIO7	0.469	0.0049	-0.2071	0.0042	-0.0716	0.365	0.1109	0.1909
BIO8	0.2471	0.0645	0.2839	0.0806	0.0313	0.4492	0.1582	0.1102
BIO9	0.2936	0.0301	0.1111	0.3319	-0.2882	0.0979	0.1449	0.1106
BIO10	0.1754	0.2085	0.1701	0.2278	0.2412	0.1058	0.0966	0.233
BIO11	0.2936	0.031	0.2306	0.2472	-0.2447	0.1504	0.1536	0.1084
BIO12	-0.346	0.0344	0.2825	0.0472	-0.3725	0.0347	0.1894	0.0777
BIO13	-0.0745	0.3245	0.1117	0.2597	-0.0523	0.3809	0.1415	0.1107
BIO14	0.4445	0.0033	0.288	0.1569	0.1808	0.1918	0.2513	0.0066
BIO15	0.3322	0.033	0.4333	0.0083	0.329	0.0536	0.2623	0.0434
BIO16	-0.1821	0.198	0.1364	0.2403	-0.0682	0.358	0.1586	0.0975
BIO17	0.4686	0.001	0.266	0.1681	0.1841	0.1836	0.2354	0.0141
BIO18	-0.1441	0.2356	0.1881	0.1722	-0.0743	0.3629	0.2013	0.0586
BIO19	0.4686	0.0009	0.1908	0.1889	-0.1116	0.2836	0.1641	0.0788
Note：**: Very significant difference (p < 0.01), *: Significant difference (p < 0.05 )
